# Supplementary material
Source: PubMed Central journal article supplement (PMC3815411)
Supplement: mbt0004-0746-SD4.pdf [file mbt0004-0746-SD4.pdf]

Table S2. Setup of the DIGE experiments. Letters A–D refer to biological replicate samples. Gels 1–4, 5–8 and 9–12 each form a separate DIGE experiment.

| Gel no. | Cy3   | Cy5   | Cy2                     |
|---------|-------|-------|-------------------------|
| 1       | 4h A  | 20h A | Mix (4h A–D + 20h A–D)  |
| 2       | 4h B  | 20h B | Mix (4h A–D + 20h A–D)  |
| 3       | 20h C | 4h C  | Mix (4h A–D + 20h A–D)  |
| 4       | 20h D | 4h D  | Mix (4h A–D + 20h A–D)  |
| 5       | 12h A | 20h A | Mix (12h A–D + 20h A–D) |
| 6       | 12h B | 20h B | Mix (12h A–D + 20h A–D) |
| 7       | 20h C | 12h C | Mix (12h A–D + 20h A–D) |
| 8       | 20h D | 12h D | Mix (12h A–D + 20h A–D) |
| 9       | 20h A | 28h A | Mix (20h A–D + 28h A–D) |
| 10      | 20h B | 28h B | Mix (20h A–D + 28h A–D) |
| 11      | 28h C | 20h C | Mix (20h A–D + 28h A–D) |
| 12      | 28h D | 20h D | Mix (20h A–D + 28h A–D) |
