# Supplementary material
Source: PubMed Central journal article supplement (PMC3815411)

Figure S1.

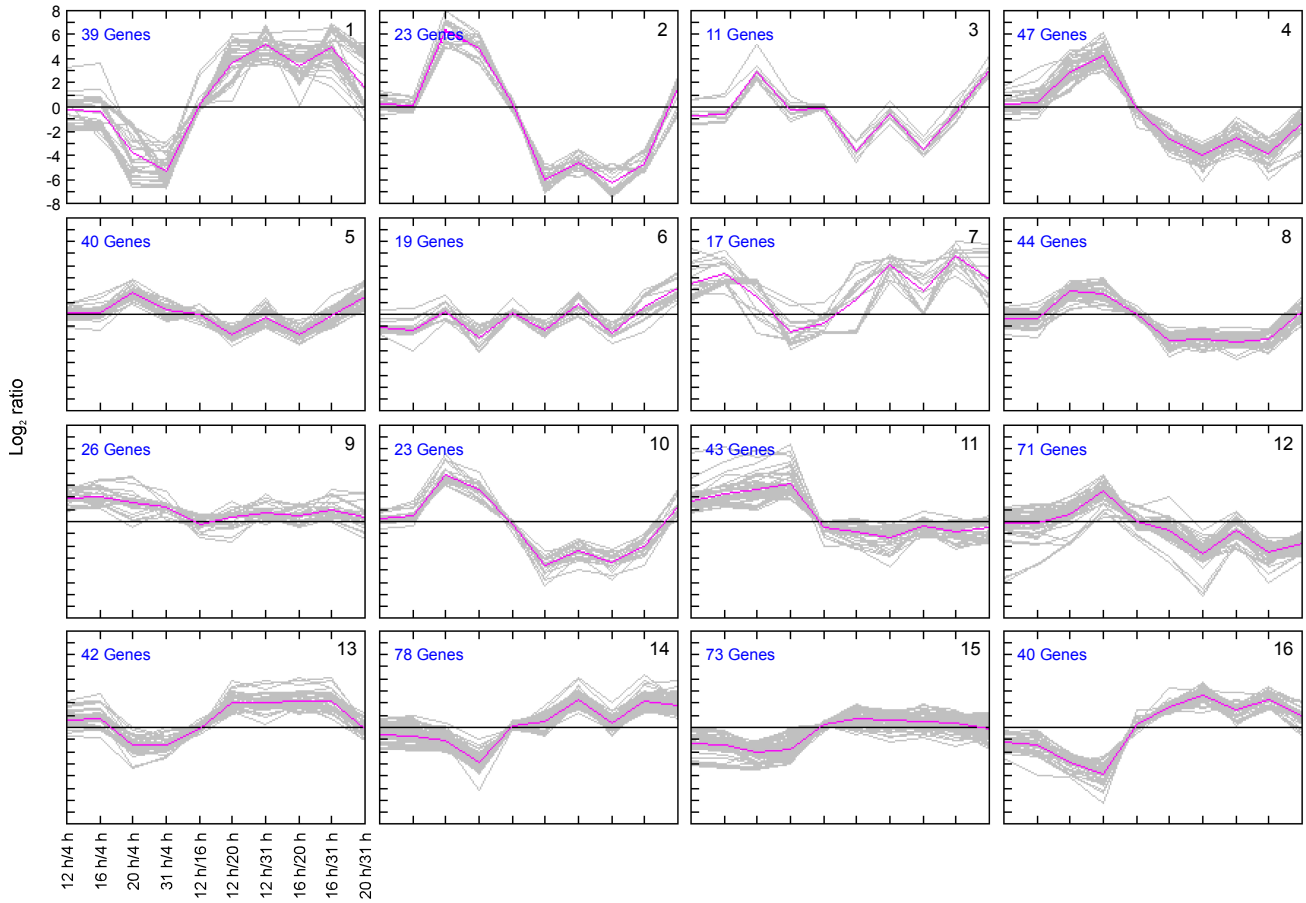

Supplement: mbt0004-0746-SD1.pdf [file mbt0004-0746-SD1.pdf]

Figure S2.

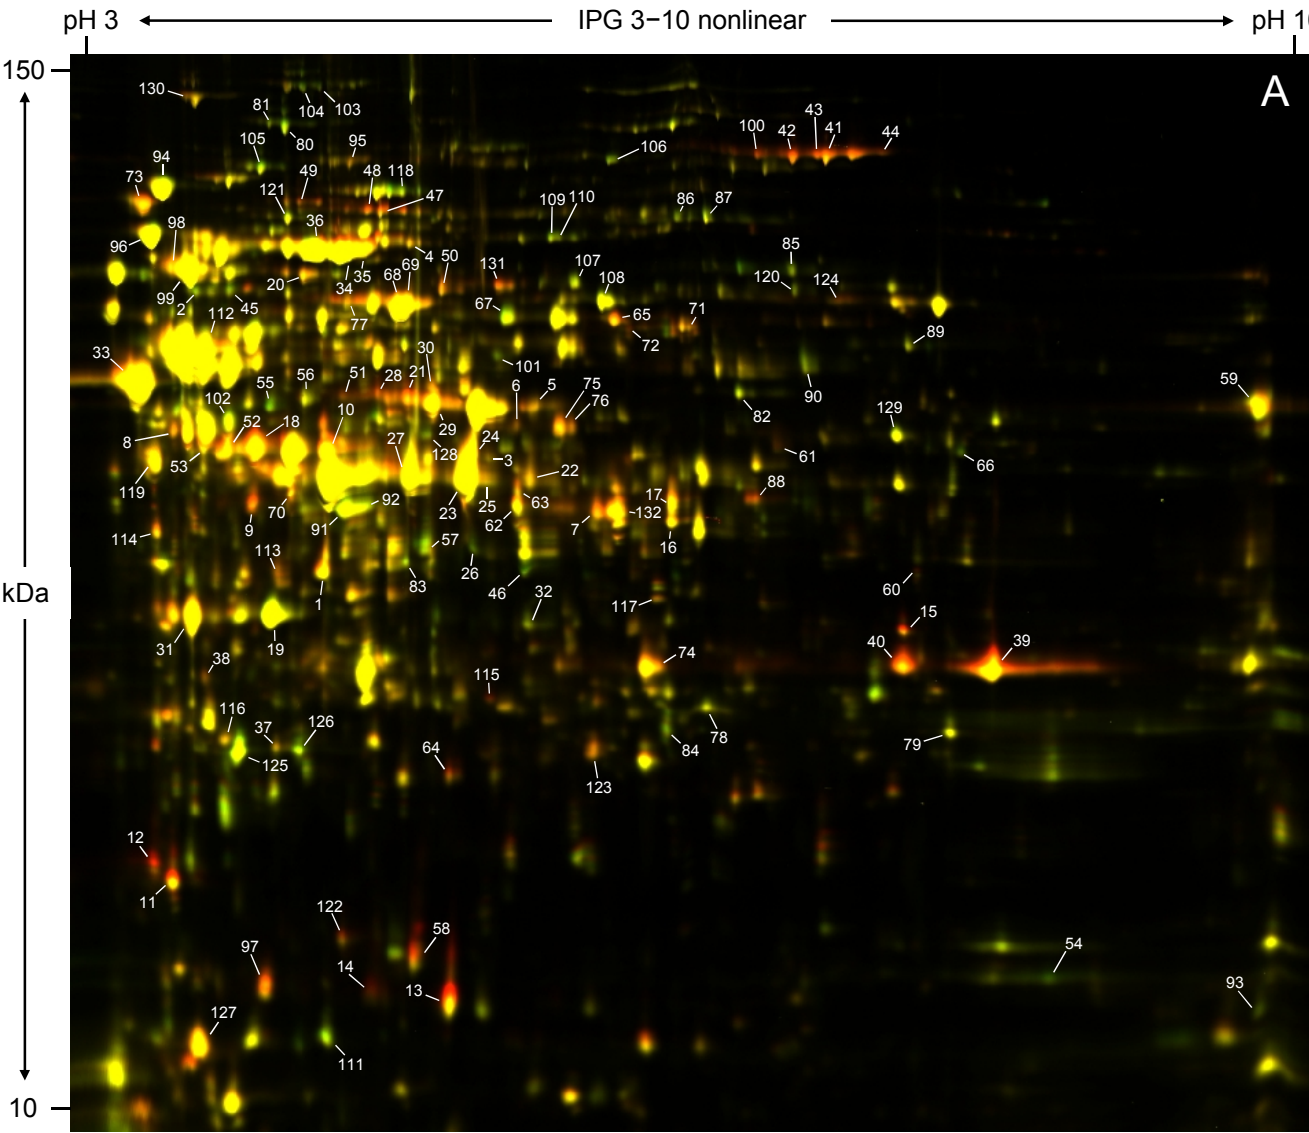

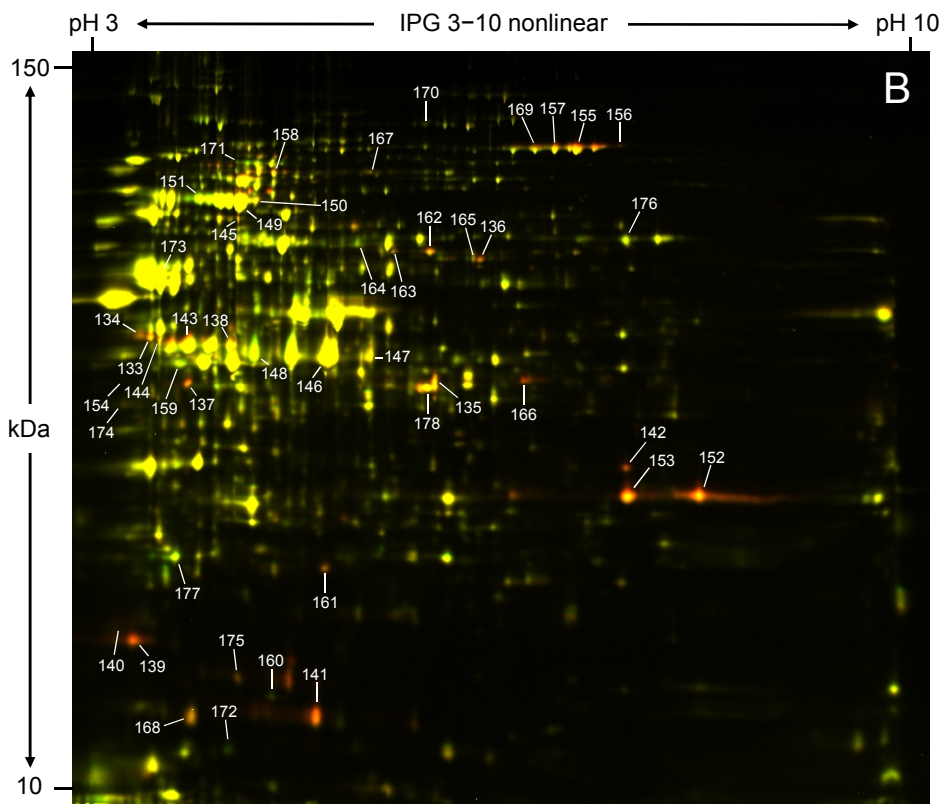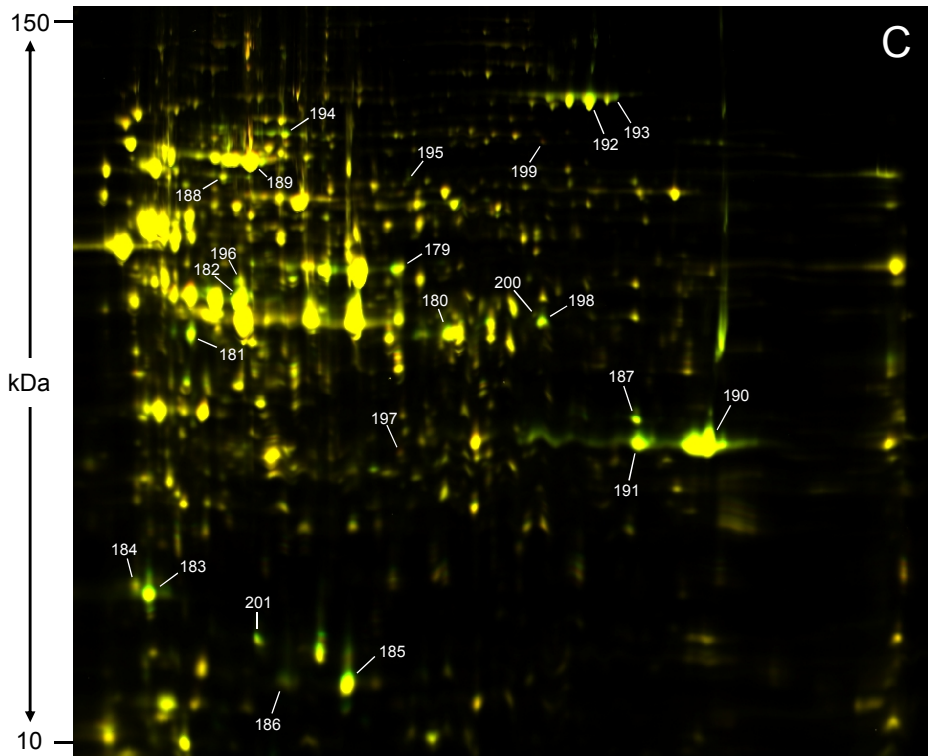

Supplement: mbt0004-0746-SD2.pdf [file mbt0004-0746-SD2.pdf]
